# Supplementary material for: Dynamics of chromatin accessibility and long-range interactions in response to glucocorticoid pulsing
Source: PubMed Central journal article supplement — Genome Res. 2015 Jun;25(6):845–57. doi: 10.1101/gr.184168.114 (PMC4448681; doi:10.1101/gr.184168.114), 2015-06
Supplement: supp_gr.184168.114_Supplemental_Table_1.pdf [file supp_gr.184168.114_Supplemental_Table_1.pdf]

**Supplemental Table 1. Primer pairs used in the modified chromosome conformation capture experiment using the Tsc22d3 gene TSS and the dynamic DHS5 as the baits.**

|                         | FOR                          | REV                         |
|-------------------------|------------------------------|-----------------------------|
| <b>TSS as the bait</b>  | <b>GATTTGCAAACAATGGAGCA</b>  | <b>TAGGCAGATGGAGGACTTCG</b> |
| <b>DHS5 as the bait</b> | <b>TTGGTCCTTGCTTTGATGAAC</b> | <b>TTATTGGCAAACCTGGCAGT</b> |
|                         |                              |                             |
| Tiling primers          | FOR                          | REV                         |
| 1                       | CAAGGGAGGAGTTGAGTGCT         | GTTCTCCTGATGGCTTCTGC        |
| 2                       | GCCCAGTGCTCAGGATAGAG         | AAAAAGCCAGGGGTTGACTT        |
| 3                       | GCAGCTTCTCTGGCGAGTAT         | TGCCATTGGAAAGGAAGTTT        |
| 4                       | CAAGACCAATGGGCCTAAGA         | TGGCTCACACCCATCTGTAA        |
| 5                       | AAGGCCCAAAGAGAGTGTC          | GTCCAGGCATCCAACCTTA         |
| 6                       | CAGGCAGAGGATCAGGAAAG         | AGTTGGGGCCATTTTTCTCT        |
| 7                       | CCCTTCAGTTAACCCACAA          | TACAGGGGTAGGGAGGGAAC        |
| 8                       | GGAGGGCATTGAAAGAACA          | CTGTGTCACGGTGAGGAATG        |
| 9                       | CCGTTTATCCAATCCAATG          | TAGTCCCCTGGTTTCCACAG        |
| 10                      | TTAAATGGAGGCTTGTTGC          | AGGCTCTGACACTTGCCACT        |
| 11                      | GGGACAGTGATTCACCCAAC         | CCATGTTACCCAAGGGAGA         |

|    |                       |                       |
|----|-----------------------|-----------------------|
| 12 | AGTTGTA CTGGCCGGTTTTG | GGCCAGCCTGGTCTACATAA  |
| 13 | CCACAGAACGATGCTCTTGA  | CAGGTCTTTGTGTCCCCATC  |
| 14 | GAGGATTGTCCTGGTGGAGA  | GGCCAGCCTGGTCTACATAA  |
| 15 | AGAGGCCTGGACATTTTGTG  | CCTGGATCACTCCTCTGCTC  |
| 16 | GAGCAGTCGGTGCTCCTAAC  | TCACAGTTCTATGCGGGTCA  |
| 17 | CGTGACCCAGTTCCTTGATT  | AGGGCAATGTGACAAAGGTC  |
| 18 | GCAGAGCCAATCCCAGTAAC  | TTGTCGTTTCCTCCCATCTC  |
| 19 | GGGTAGCAGGAACATCCTCA  | TGAACCTGGGTCTCTGGAT   |
| 20 | GGCCAGCAAGCAGAGATATT  | GCCCAATTACTGCCCAAAT   |
| 21 | CGAAGTCCTCCATCTGCCTA  | CCAATCCTTTGGA ACTCAGG |
| 22 | GTGGGTGGATGACAGAGGAT  | ACCAGCAAAGACCCATACA   |
| 23 | CGTTC CATTGGTCTGTTCT  | TCTGATGCTGGGATTTTCC   |
| 24 | AAGCACGGAAATGGAAAATG  | AATCTCCACCCACAATGACC  |
| 25 | CAGGGATGCCAAATCTCAAT  | AGGTGACGTTGCCAGAGAAT  |
| 26 | CATCTCTGGGGAAACAGGAA  | ATTTTGCAGCCAGCTTGAGT  |
| 27 | GTCCAACGTGGTGACTTTGA  | ATCACCAAGTGGTGGGCATA  |
| 28 | GGTGGGCATTCAAAGCTCTA  | AGGGTGATAAGCAGGCAGAA  |
| 29 | GGTTGAGCAGGAAATGGGTA  | CAGGGGAAGTAACCCCTAGC  |
| 30 | CAGCCTGAGATTTTGGGATT  | GCCTCTGCCTTTAGCTATCC  |

|    |                      |                      |
|----|----------------------|----------------------|
| 31 | GTGCCACTGGGAGACATTTT | GGAGCACAAGGGATTACAT  |
| 32 | ACTCCAGCTTGCCTGTCTGT | TCAGAAGCCGTTTTCAGGTT |
| 33 | GTGGCTGTCCTGGAATCAT  | CTTGCCCTATGTCTCGCAAT |
| 34 | CTTAAAGCCCAGGGACCAGT | CCCCCTAAGATGTGGGTTCT |
| 35 | CCACAGGCAGCTATTGTTGA | CATCCTAGTGGAGCCTCAGC |
| 36 | TACGATGCCTTCAAGTGTGC | TCTGCTTTCTTCAGCTTTGC |
| 37 | TTGGTTTTTCTTGCCACCTC | TGTTAAGGGCCACAGACCAT |
