# Supplementary material for: Dynamics of chromatin accessibility and long-range interactions in response to glucocorticoid pulsing
Source: PubMed Central journal article supplement — Genome Res. 2015 Jun;25(6):845–57. doi: 10.1101/gr.184168.114 (PMC4448681; doi:10.1101/gr.184168.114), 2015-06
Supplement: supp_gr.184168.114_Supplemental_Table_2.pdf [file supp_gr.184168.114_Supplemental_Table_2.pdf]

**Supplemental Table 2. Primer pairs used in the modified chromosome conformation capture experiment using a persistent DHS near the ATP6v1g1 gene as the bait.**

|                                   | FOR                         | REV                        |
|-----------------------------------|-----------------------------|----------------------------|
| <b>Persistent DHS as the bait</b> | <b>TCTAGGTGAGGTGGCACACA</b> | <b>CCATCCCAAAAGTCCCCCT</b> |
|                                   |                             |                            |
| Tiling primers                    | FOR                         | REV                        |
| 1                                 | TGCCTGTTGTGATTCCTTTG        | GCTGTGTTTGGAGACCCCTA       |
| 2                                 | CTGTGCAGTCAGAGGCAGAA        | GAACAAGTCTGCCGTCATCC       |
| 3                                 | GCACCAAGGGGACTGAGTTA        | TCCTCCTCCTCATCACTGCT       |
| 4                                 | CGTGGGGCTGTGTATGTATG        | TGATGGAGCTGCAGAGAGAA       |
| 5                                 | GCTGGTCCCCAGAATAATCA        | CCTAGGCAGCAAAAGTCCTG       |
| 6                                 | AGCCCTTTTCCATTCATTCC        | CGGGAAATGCATCTCAAGTT       |
| 7                                 | CAGGGTGTGTTGAATTGTGG        | CTAGGCTGGGAGAGATGTGG       |
| 8                                 | GACTTTCCACAGGCCAAT          | TCCTGGTCAGCTTTAATGTCAA     |
| 9                                 | CAGGCCCAACACACATACAG        | TTCTCCCCTTTGCTTTTTGA       |
| 10                                | CGGGGCACAGAAATCATAG         | CGCCTAGTATCACATTGCCATT     |
| 11                                | AGCGTGCTGCTCTTGGTATT        | GCCTCCTCTGAAAGACGTTG       |
| 12                                | CACACCCCTTTGGTGTCTTCT       | ACGTCTCCTTGGTAGGCTGT       |

|    |                             |                       |
|----|-----------------------------|-----------------------|
| 13 | TTCTAGAACATAGTGAAGTCTCACCAA | AACAGATATGGCCACAGGTCA |
| 14 | TTGCACACGCTTTGACTACC        | AGAGACCAGGTGAGCTGCAT  |
| 15 | CCAAGAAAGTATGCCCTGGA        | CCTGTGGGCTTTGGAAAGTA  |
| 16 | GGGTGAAGAGAGGGGGTAAA        | GCAGTCCTGTCACGTGGTTA  |
| 17 | GGTCAGTTGAGAGGCAGAGG        | TCCCTTGAACCACCTACACC  |
| 18 | CAGGAAATGGAGGCAGAGAG        | AAATCACAGCACCCACATCA  |
| 19 | GGCTAGCCAAGGTGTAGCTG        | CCTAGATGGCCACTCCTTCA  |
| 20 | GTTGGGGAGATGCTGTTGTT        | CTAAAGGTGACTGGGGGTCA  |
| 21 | GGGGCAGCTGTGATGTTTAT        | TCCCTCCACTGTGTCTGTCA  |
| 22 | CAGGGATGCCTCAGGTTTTA        | TGAACAATGGCAACAGAAGG  |
| 23 | CCTGGTCTGGTGTGAAGTCT        | GATATGGAGAGCGGGGTTTT  |
| 24 | AGGTGTCACCACTGTGGATATG      | ACTGCTGAGGATGCAGAGGT  |
| 25 | TGGTTGCTCAGTGTCTCCAG        | GTGGGTTCTTGCAGCTTCTC  |
| 26 | TGAGCCCAAATTGTGTGAAA        | TTCAGGAAAATGCCCTCAG   |
| 27 | TGTCACAGAGCTGGGAACTG        | ACATTGTGGACAGTGGGACA  |
| 28 | TTGTCCCATTTCTGTCTGACA       | GGTGGCCTAGGACAGAACAG  |
| 29 | GGGGGAAATCAAGAATGACA        | TCCAGGAGTGTTCTGGGACT  |
| 30 | GACTGTCTGGGGTTCATTCC        | ACTGGTGCCCAACCTAACAG  |
| 31 | TGGGAGGAAAGAACCAGCTA        | GGAATGACCAAGGGGAAGTGA |
