# Supplementary material for: Dynamics of chromatin accessibility and long-range interactions in response to glucocorticoid pulsing
Source: PubMed Central journal article supplement — Genome Res. 2015 Jun;25(6):845–57. doi: 10.1101/gr.184168.114 (PMC4448681; doi:10.1101/gr.184168.114), 2015-06
Supplement: supp_gr.184168.114_Supplemental_Table_3.pdf [file supp_gr.184168.114_Supplemental_Table_3.pdf]

**Supplemental Table S3. Primer sequences for EP300 (p300) ChIP analysis of transient and persistent DHSs.**

| <b>Primers</b>                   | <b>Sequence</b>      |
|----------------------------------|----------------------|
| chr3:107,594,794-107,604,794 For | AAAACATCACGACCCAAAGC |
| chr3:107,594,794-107,604,794 Rev | TTCATCTGTCCAGTGCTTGC |
| chr4:63,179,082-63,238,451 For   | GGAGGACTGTGGGTTCAAAA |
| chr4:63,179,082-63,238,451 Rev   | TACAGCCTTCAGCCTCCAGT |
| chX:137,040,234-137,040,820 For  | CCGTTTATCCAATCCCAATG |
| chX:137,040,234-137,040,820 Rev  | TAGTCCCCTGGTTTCCACAG |
| chr3:145,548,221-145,549,673 For | AAGCCACTTCCTCCATCCTT |
| chr3:145,548,221-145,549,673 Rev | ACCGACAGGCTTTCTCTTCC |
| chr4:140,974,266-140,984,266 For | AGCCAGCTCCACTGAACACT |
| chr4:140,974,266-140,984,266 Rev | TCCACAGCAGTGACTGGAAG |
| chr18:81,225,647-81,235,647 For  | GGTTTGTGGGACTCACGTCT |
| chr18:81,225,647-81,235,647 Rev  | CGTTTGGGTCAAAGGCTAA  |
