# Supplementary material for: Dynamics of chromatin accessibility and long-range interactions in response to glucocorticoid pulsing
Source: PubMed Central journal article supplement — Genome Res. 2015 Jun;25(6):845–57. doi: 10.1101/gr.184168.114 (PMC4448681; doi:10.1101/gr.184168.114), 2015-06
Supplement: supp_gr.184168.114_Supplemental_Table_4.pdf [file supp_gr.184168.114_Supplemental_Table_4.pdf]

**Supplemental Table S4. Primer sequences for qPCR analysis.**

| <b>1. Primers for nascent transcripts</b> | <b>Sequence</b>          |
|-------------------------------------------|--------------------------|
| <i>Lcn2</i> For                           | ACCTCTCATTTCTTGCAGTTCCG  |
| <i>Lcn2</i> Rev                           | CAGGATGGAGGTGACATTGTAGCT |
| <i>Tgm2</i> For                           | TGTCACCAGGGATGAGAGACGG   |
| <i>Tgm2</i> Rev                           | TCCAATCACACCTCTCCAGGAG   |
| <i>Mt1</i> For                            | GCTGGCAGCATTTGTTGACCAAC  |
| <i>Mt1</i> Rev                            | TGGTTTCCTGCCTCTGACTTGG   |
| <i>Tsc22d3</i> For                        | ACATGATGGTGGCATGAAGA     |
| <i>Tsc22d3</i> Rev                        | TCTTCTCAAGCAGCTCACGA     |
| <i>Bcl2l1</i> For                         | CTCTAACCATGGTGGGCACT     |
| <i>Bcl2l1</i> Rev                         | TGTCTGGTCACTTCCGACTG     |
| <i>Nfil3</i> For                          | CACAGCACCCCCTTTTACAG     |
| <i>Nfil3</i> Rev                          | CATCCATCAATGGGTCCTTC     |
| <b>2. Primers for housekeeping gene</b>   | <b>Sequence</b>          |
| <i>ACTB</i> For                           | ACTGGGACGACATGGAGAAG     |
| <i>ACTB</i> Rev                           | AAGGGTTACCCGGGATACTG     |
