# Supplementary material for: Dynamics of chromatin accessibility and long-range interactions in response to glucocorticoid pulsing
Source: HighWire-hosted journal article supplement (doi:10.1101/gr.184168.114), 2015-02-12
Supplement: Supplemental_Text.docx [file Supplemental_Text.docx]

**Supplemental Information**

Stavreva et al. “**Dynamics of chromatin accessibility and long-range interactions in response to glucocorticoid pulsing**”

Authors for correspondence: [hagerg@exchange.nih.gov](mailto:hagerg@exchange.nih.gov) and [stavrevd@mail.nih.gov](mailto:stavrevd@mail.nih.gov)

-10 Supplemental Figure legends

-4 Supplemental Table legends

-3 Supplemental Movie legends

**SUPPLEMENTAL FIGURE LEGENDS**

**Supplemental Figure 1. GR interactions with GREs in response to pulsed and constant hormone stimulation.** (**A**) GR association with the *MMTV* promoter array in response to pulsed and constant hormone stimulation as measured by GR ChIP method. Error bars represent the mean ± s.e.m., n=4. (**B-E**) GR ChIP-seq method reveals receptor enrichment at sites situated upstream, downstream, as well as in the body of several GR regulated genes upon hormone simulation (20' sample). These peaks diminish upon hormone washout (60' pulsed condition) while increasing both in numbers and tag density upon continuous hormone stimulation (60' constant condition).

**Supplemental Figure 2. Examples of transient and persistent hypersensitive sites.** (**A**) Transient DNase I hypersensitive sites could be *de novo* or preexisting, while the persistent sites (**B**) are exclusively preexisting. In addition, transient DHSs are more likely to be bound by GR than the persistent DHSs.

**Supplemental Figure 3. Sub-populations of DHSs revealed by correlations of their kinetic behavior with various features.** (**A**) HSV representation of whole-genome DHS time profiles before subtracting the media-induced changes in the hypersensitivity is re-colored based on various features (**B-H**) as indicated on each panel. Position still represents DHS time profile as in (**A**). It reveals three distinct sub-populations: (i) Sites showing a transient profile with more or less recovery in the pulsed treatment and an increasing profile or a profile approaching a plateau in the constant treatment are mostly highly loaded by GR (**B**), not pre-occupied by Pol II [(**C**), Data related to Fig. 5], not at promoter (±2.5kb) (**E**), and slightly enriched in distal upstream regions (**D**). (ii) Sites which exhibit a transient behavior in both treatments (laying around 120°~130°) are on the contrary deprived of GR (**B**), preloaded by Pol II (**C**) and at promoters (**E**). (iii) Other kinetic behaviors correspond to sites that are either not or weakly loaded by GR, pre-occupied by Pol II and at promoters. Importantly, the observed segregations hold down to ~20% saturation (e.g. **B**, **C** and **E**), showing that the hue indicator accurately categorizes the shape of the time profile even for very moderate variations, although with lesser precision due to experimental noise.

**Supplemental Figure 4. Hue-saturation-value (HSV) color-space interpretation of GR ChIP-seq data.** The time course of GR ChIP-seq signal at each DHS is represented using the color-space method shown in Fig. 3A-C. (**A**) In the pulsed treatment, most sites display a transient occupancy by GR (close to 120o) although the recovery to pre-treatment levels after hormone washout can be incomplete for certain sites (as indicated by the spread from 120o towards 60o). This is especially valid for the sites that are only moderately loaded by GR after hormone stimulation (i.e. dim points). Sites that are strongly loaded by GR (i.e. brightest points) lay between the 100o and 120o profiles and are characterized by either complete recovery of pre-treatment levels or a partial recovery where only a third of the hormone-induced increase in hypersensitivity is retained after the 40 min washout. (**B**) Constant treatment results in profiles that spread out mostly between 0o and 50o, even for highly loaded sites, indicating that certain sites can saturate while others can display a delayed response. However, almost no sites have the 60o plateau profile, showing that longer hormone treatment predominantly results in higher GR occupancy, with very few cases of complete saturation after 20 min. See movie S1 for 3D animations.

**Supplemental Figure 5. Correlation between GR loading and DHS accessibility time profiles.** (**A**) This figure compares the shape of the time profiles of GR loading against that of DNase I hypersensitivity in response to a pulsed treatment, at hormone-responsive sites (i.e. sites shown on Fig. 4A). Colors represent the GR loading time profile as on Supplemental Fig. S4A. There is no obvious correlation between the time profiles of GR loading and of DNase I hypersensitivity. (**B**) Selecting for sites where the tag count of DNase-seq reaches at least 80 reveals a modest but significant correlation (Pearson > 0.299, p-value < 1.2x10^-4, one-sided permutation test). Including other sites decreases the correlation and its significance. This result suggests that, on certain sites, a long lifetime of DNase I hypersensitivity may be related to somewhat long-lived GR loading.

**Supplemental Figure 6. Motifs and factors associated with transient and persistent DHSs.**

(**A**) Motif analysis revealed a strong enrichment of the transient group for NR3C1 (GR response element), JUN (AP1), and RUNX1 (which could also be categorized as a half GRE), consistent with the observation that this group is more enriched for GR (Supplemental Fig. S3B). (**B**) In contrast, persistent DHSs are enriched for JUN (AP1), an unknown motif, and CTCF. (**C**) Aggregate plots demonstrating an enrichment of factors at the persistent DHSs. The JUN (cJun) data are adapted from Biddie et al, 2011. (**D**) HSV scatter plots where axes represent DHS kinetics (as in Fig. 4A) and the colors represent binding of JUN (AP1), EP300 (p300), SMARCA4 (Brg1), and CTCF prior to glucocorticoid treatment.

**Supplemental Figure 7. Enhancer activity at transient and persistent DHSs as measured by the level of EP300.** (**A**)HSV scatter plots where axes represent DHS kinetics (as in Fig. 4A) and colors EP300 ChIP-seq -/+ Dex (red indicates an increase, blue indicates a decrease, and white indicates no change in the EP300 loading at a specific DHS). Green arrows represent transient DHSs that were used in panels B and C, and yellow arrows represent persistent DHSs used in panels D and E. (**B**) Examples of EP300 ChIP-seq signal over transient in the absence and presence of hormone (-/+ Dex). (**C**) Changes in the EP300 ChIP signal over transient sites in response to pulsed and constant hormone stimulation. Error bars represent the mean ± s.e.m., n=4. (**D**) Examples of EP300 ChIP-seq signal over persistent sites in the absence and presence of hormone (100 nM dexamethasone). (**E**) Changes in the EP300 ChIP signal over persistent sites in response to pulsed and constant hormone stimulation. Error bars represent the mean ± s.e.m., n=4.

**Supplemental Figure 8. Pol II-S5 occupancy over gene bodies as a readout for the transcriptional activity of the respective genes.** (**A**) Pol II-S5 enrichment at the *MMTV* array by Pol II S5 ChIP. (**B**) Pol II-S5 enrichment at the *MMTV* array by Pol II S5 ChIP-seq method. The yellow bar highlights the position of the transient DHS at the *MMTV* array locus (Fig. 1B). Black arrows indicate the increase of the Pol II S5 ChIP-seq signal in the presence of corticosterone. Error bars represent the mean ± s.e.m., n=4. (**C-H**) Comparison of the Pol II S5 ChIP-seq signal over gene bodies to gene transcription activity as measured by the release of nascent RNA demonstrates an excellent concordance between the two approaches. The Pol II S5 ChIP-seq signal is further used as readout for the gene activity genome-wide. Real time qPCR data are normalized to *ACTB (beta Actin)* and presented as fold change over the control (0', unstimulated) condition. Error bars represent the mean ± s.e.m., n=4. (**I**) A comparison of the transcriptional response of the entire gene population upon treatment with the natural hormone (corticosterone) with the response upon treatment with a synthetic hormone (dexamethasone) for 60 min will allow detection of ligand-specific effects. The HSV representation method is also used here. However, instead of representing 3 different time points of corticosterone (Cort) treatment, we use the 3 following data points: pre-treatment, treatment with Cort (60') and treatment with Dex (60'). The "hue" parameter (abscissa) naturally enumerates all the possible ligand-specific responses (see key at top of panel). In contrast to the natural hormone, dexamethasone was a stronger repressor of gene transcription while corticosterone activated transcription of a significantly larger number of genes (see also Fig. 5G and H).

**Supplemental Figure 9. Modified chromosome conformation capture approach and its application to detect enhancer/promoter contacts.** (**A**) Schematic representation of a genomic region of interest where the gray bar in the center represents the bait/viewpoint and the colorful fragments (number 1 to 5) represent neighboring loci each of them bordered by restriction sites for the primary and the secondary restriction enzyme. Ideally, interactions of the bait with distal fragments (defined by restriction sites) will lead to the creation of hybrid molecules containing the bait and the “capture”. Other circular molecules, which do not contain the bait are also present. Bait-specific primers are used in PCR reactions to enrich for its associated fragments from the 4C library. Quantitative PCR is used to measure the relative abundance of a given fragment in the amplified 4C pool. The unamplified 4C library will serve to normalize for primer efficiency and possible variation of the fragments abundance. (**B**)CTCF peaks (determined by the CTCF ChIP-seq) flank the *Tsc22d3* gene and the GR-bound hypersensitive sites (**C** and **D**) downstream of the gene (marked DHS1 to 5). This could represent a transcription unit relying largely on long-range interaction with distal enhances for the hormone-dependent activation of the *Tsc22d3* gene. (**E**) Enrichment of the intrachromosomal interactions in the subdomain encompassing the *Tsc22d3* gene. The Hi-C data are obtained from (Dixon et al., 2012) and are superimposed on the genomic region chrX:136,500,000-137,500,000 encompassing the transiently induced *Tsc22d3* gene (represented by a single green circle on the lower plot, i.e. shape of Pol II time profile) and the associated transient hypersensitive sites (represented by a number of green circles on the upper plot, i.e. shape of DHS time profile). Note that the entire region displayed here lays within a single topologically associating domain (TAD) which coordinates are chrX:135840000-137560000 according to (Dixon et al., 2012) . (**H**) Low level of GR loading at the TSS-associated hypersensitive site of the Tsc22d3 gene is only detectable after 60 min of hormone treatment (note the different scale). (**G**) Hormone-dependent increase of the interaction frequency of the bait (the *Tsc22d3* TSS, gray shading) with the most distal DHS (DHS 5) (yellow shading in **F**). A similar, but less significant trend is observed for DHS4 (purple shading in (**G**). For the most closely situated hypersensitive sites a significant difference in the interaction frequency with the bait was observed only upon 60 min of hormone treatment. The reason for this could be that closer proximity of the bait obstructs the detection of small changes at these sites. Error bars represent the mean ± s.e.m., n=8.

**Supplemental Figure 10. Mapping the long-range interactions of a persistent DHS with the promoter region of the nearby *Atp6v1g1* gene.** (**A**) CTCF binding sites (determined by the CTCF ChIP-seq) at the *Atp6v1g1* locus. A persistent DHS (**C**) coinciding with a major GR peak (**B**) and situated approximately 20 kb upstream of the promoter of the *Atp6v1g1* gene was selected for the bait (gray shading in **A-E**). (**D**) Pol II binding reveals that the transcription of the *Atp6v1g1* gene was elevated even after hormone withdrawal. (**E**) A modified chromosome conformation capture approach using the 4C DNA and the persistent DHS as the bait. (**F** and **G**) Two promoter associated loci exhibit an elevated interaction frequency with the upstream, persistent DHS during the washout (see also the yellow and purple shading in **A-E**). Error bars represent the mean ± s.e.m., n=8.

**SUPPLEMENTAL TABLE LEGENDS**

**Supplemental Table 1. Primer pairs used in the modified chromosome conformation capture experiment using the Tsc22d3 gene TSS and the dynamic DHS5 as the baits.**

**Supplemental Table 2.** **Primer pairs used in the modified chromosome conformation capture experiment using a persistent DHS near the ATP6v1g1 gene as the bait.**

**Supplemental Table 3.** **Primer sequences for EP300 (p300) ChIP analysis of transient and persistent DHSs.**

**Supplemental Table 4.** **Primer sequences for qPCR analysis.**

**SUPPLEMENTAL MOVIE LEGENDS**

**Supplemental Movie 1. Rotating 3D plot of GR ChIP-seq data in HSV color-space.**

GR ChIP-seq data at all DHSs is shown for the pulsed treatment (**A**) and for the constant treatment (**B**).

**Supplemental Movie** **2. Rotating 3D plot of DNase-seq data in HSV color-space.**

DNase-seq data at responsive DHSs is shown for the pulsed treatment (**A**), for the constant treatment (**B**) and alternating between pulsed and constant treatments (**C**).

**Supplemental Movie 3. Rotating 3D plot of Pol II ChIP-seq data in HSV color-space.**

Pol II ChIP-seq over the body of responsive genes is shown for the pulsed treatment (**A**), for the constant treatment (**B**), and alternating between pulsed and constant treatments (**C**).
