# Supplementary figures and images for: Dynamics of chromatin accessibility and long-range interactions in response to glucocorticoid pulsing
Source: PubMed Central journal article supplement — Genome Res. 2015 Jun;25(6):845–57. doi: 10.1101/gr.184168.114 (PMC4448681; doi:10.1101/gr.184168.114), 2015-06

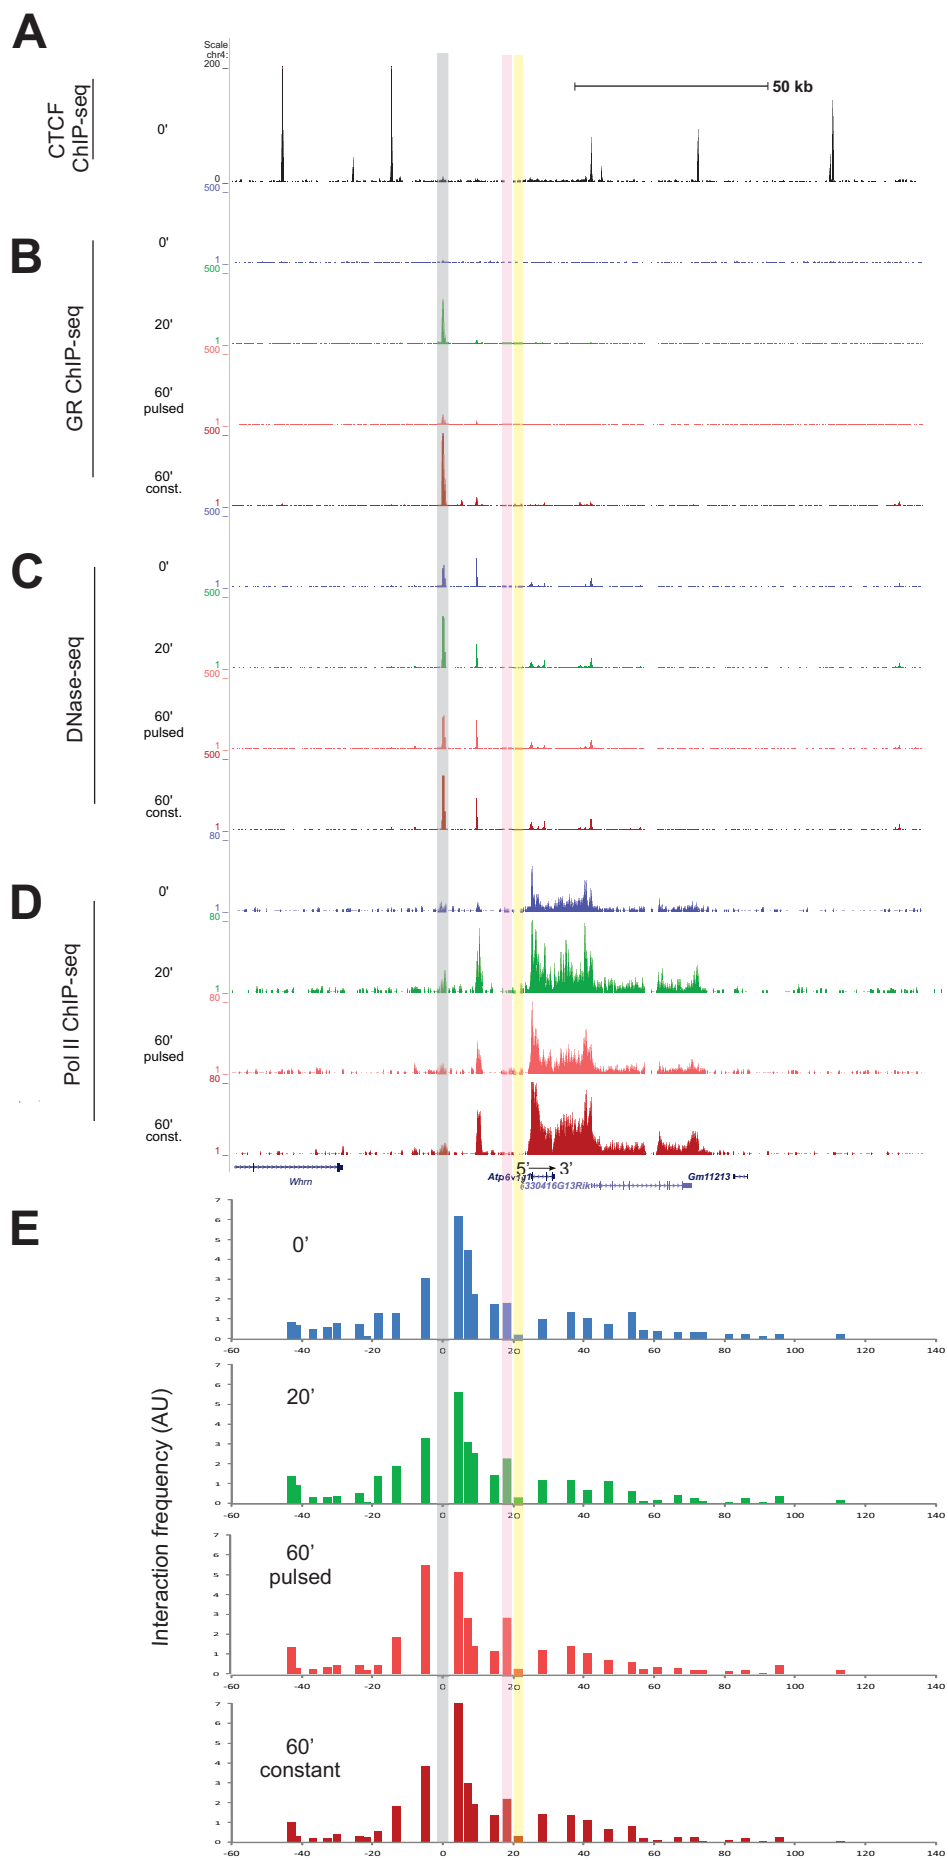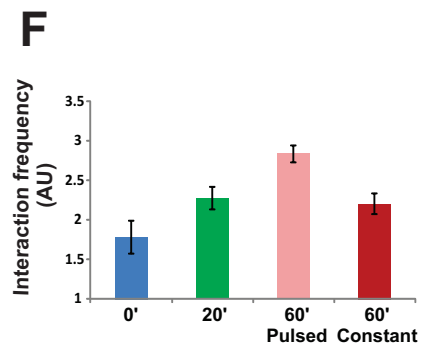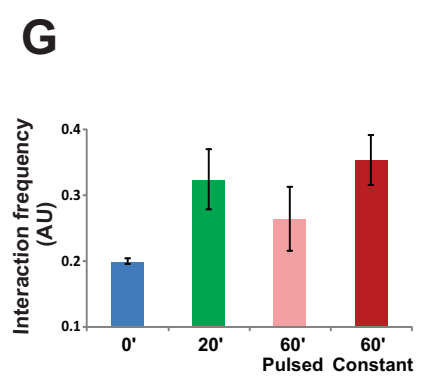

Supplement: supp_gr.184168.114_FigureS10_1.pdf [file supp_gr.184168.114_FigureS10_1.pdf]

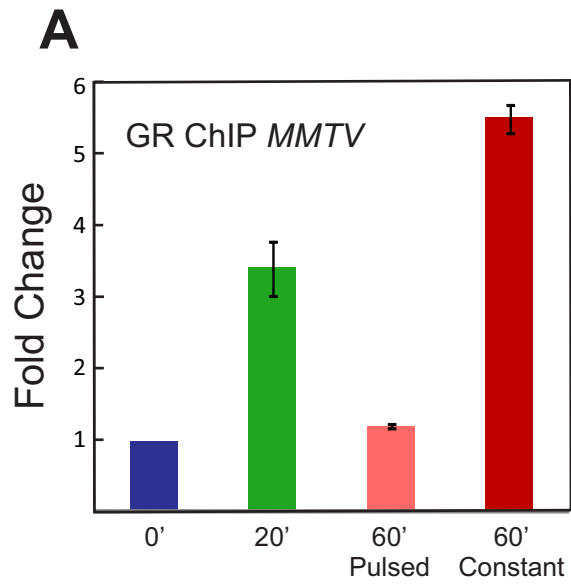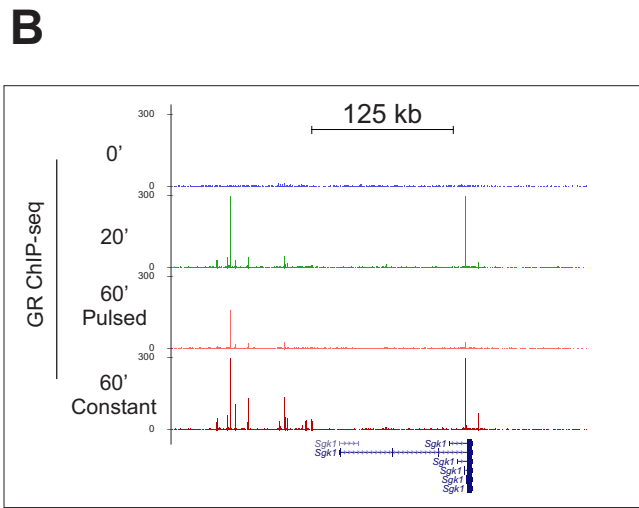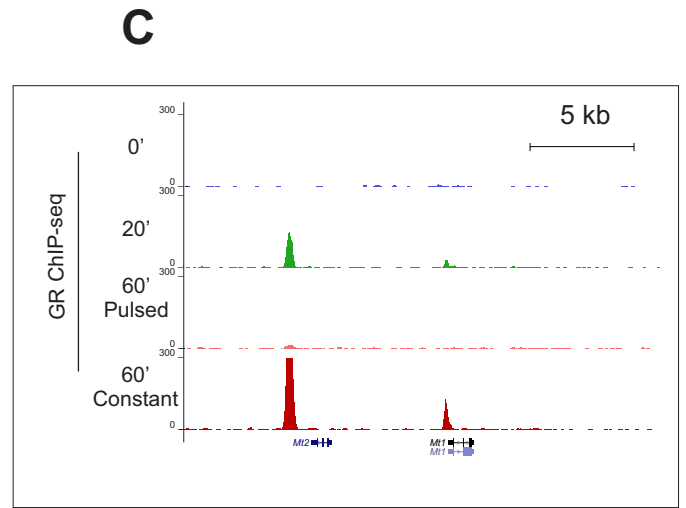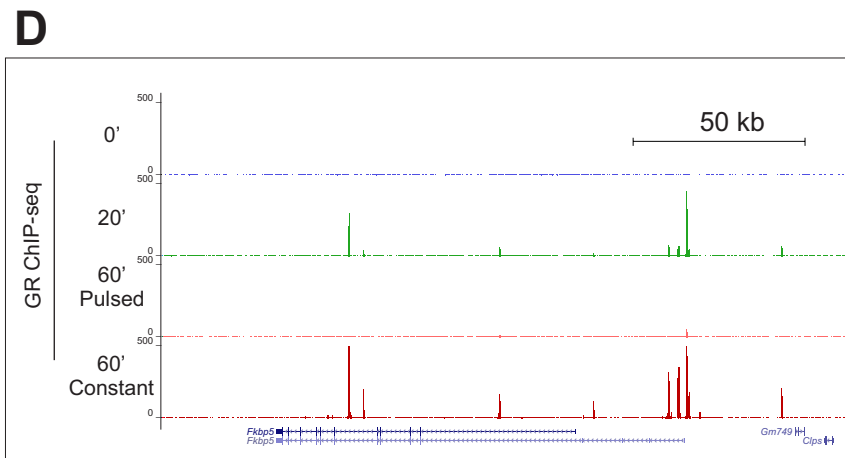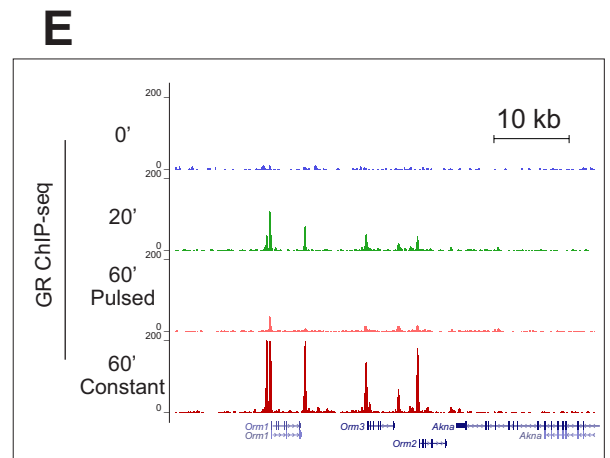

Supplement: supp_gr.184168.114_FigureS1_1.pdf [file supp_gr.184168.114_FigureS1_1.pdf]

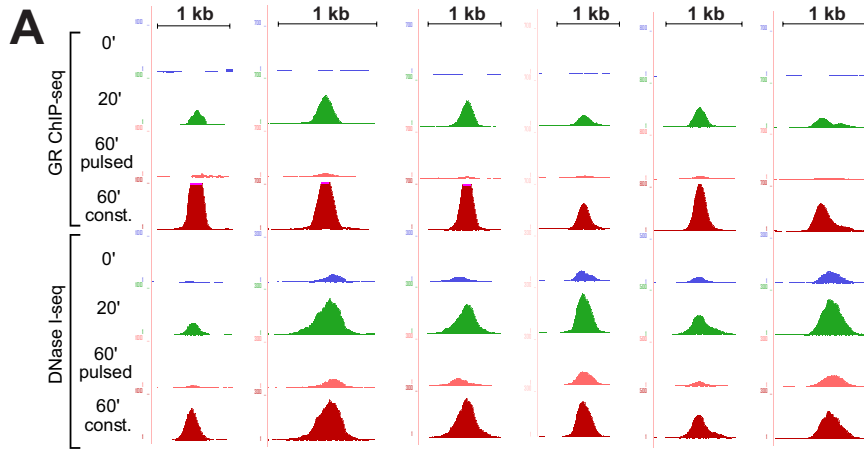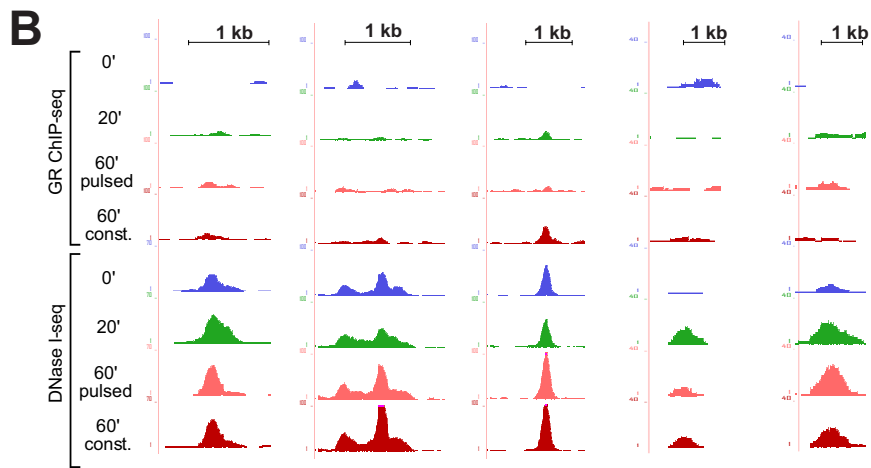

Supplement: supp_gr.184168.114_FigureS2_1.pdf [file supp_gr.184168.114_FigureS2_1.pdf]

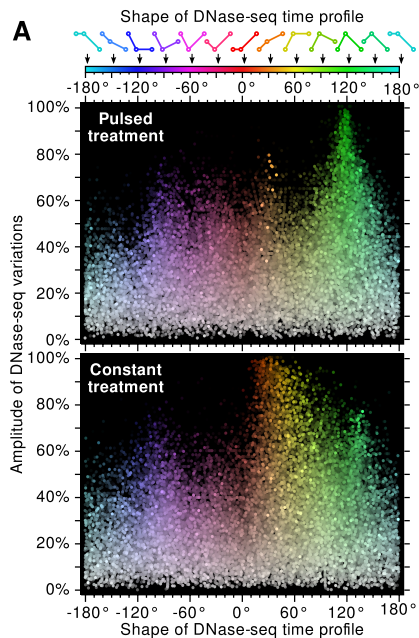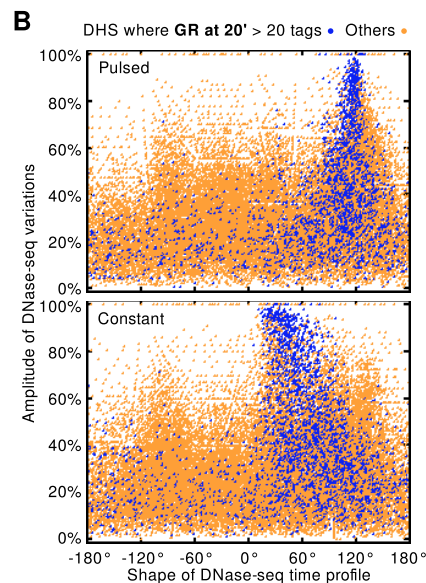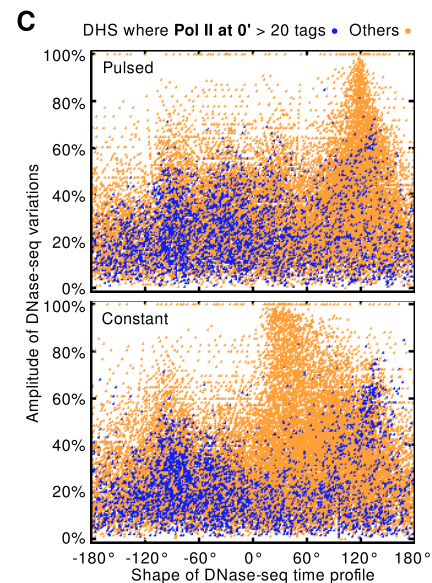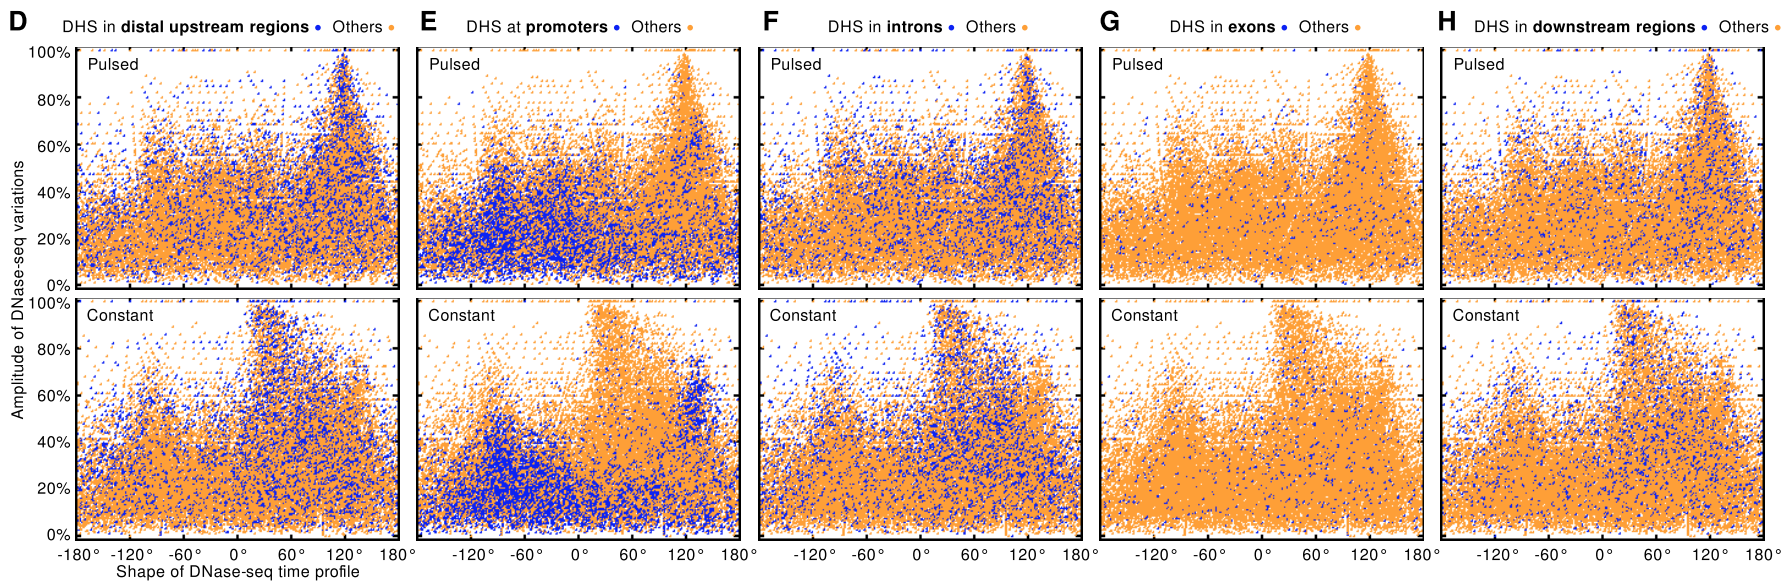

Supplement: supp_gr.184168.114_FigureS3_1.pdf [file supp_gr.184168.114_FigureS3_1.pdf]

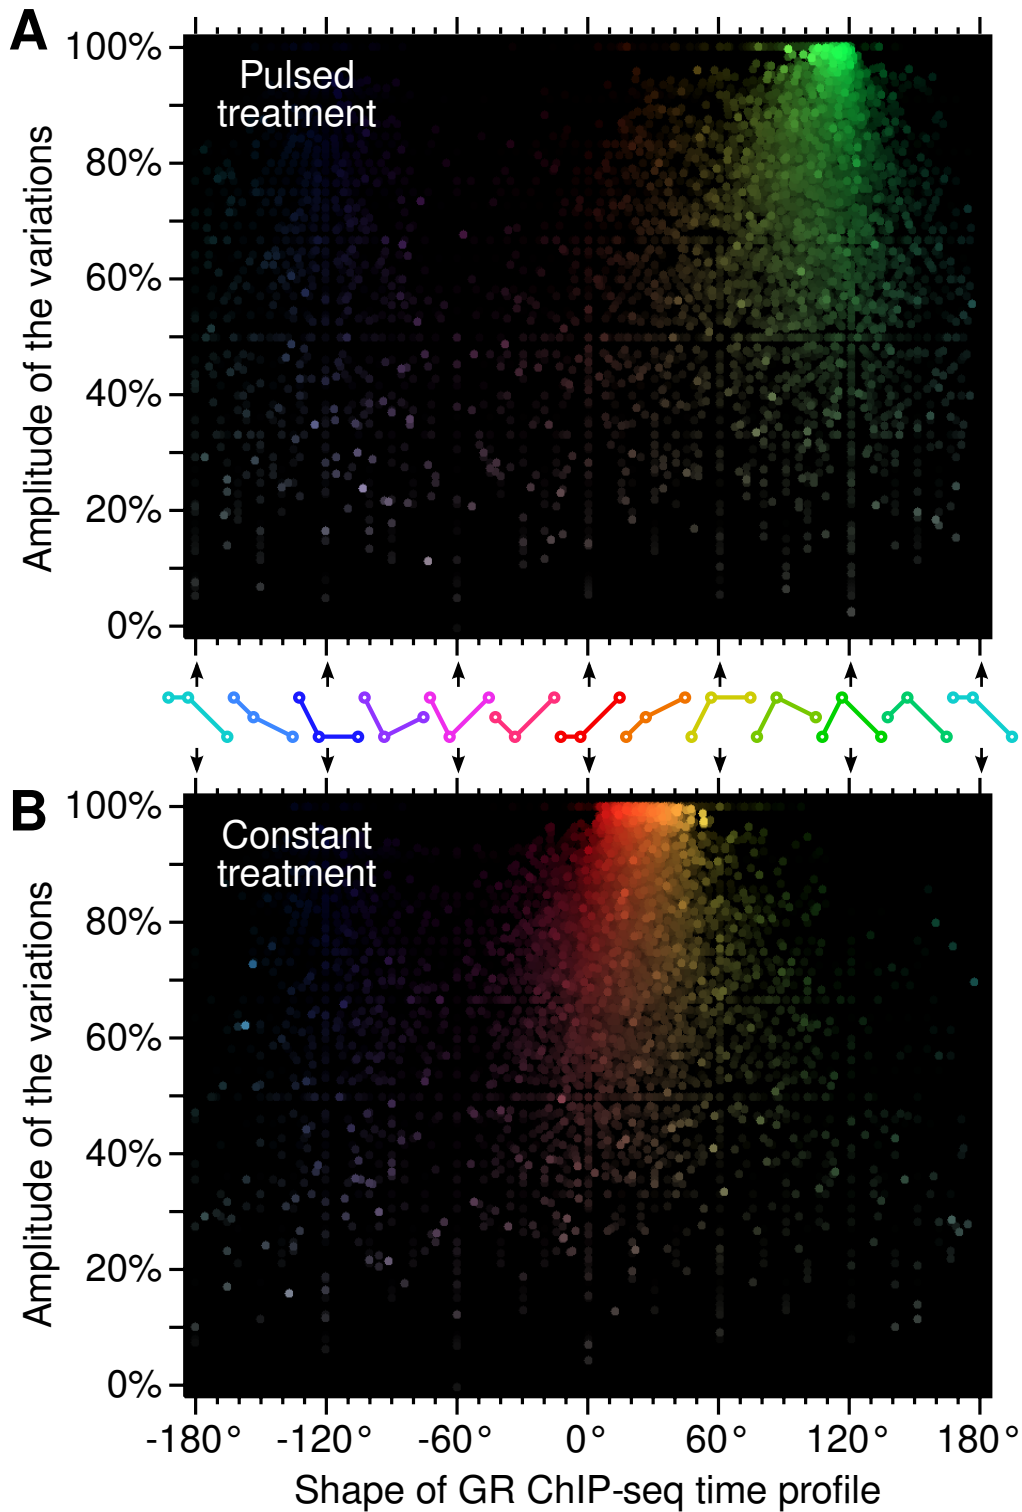

Supplement: supp_gr.184168.114_FigureS4_1.pdf [file supp_gr.184168.114_FigureS4_1.pdf]

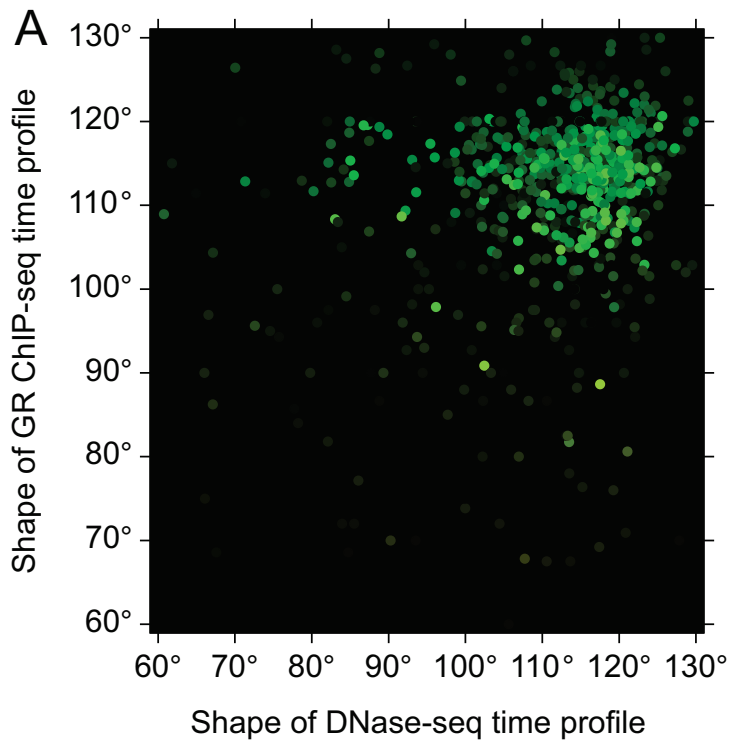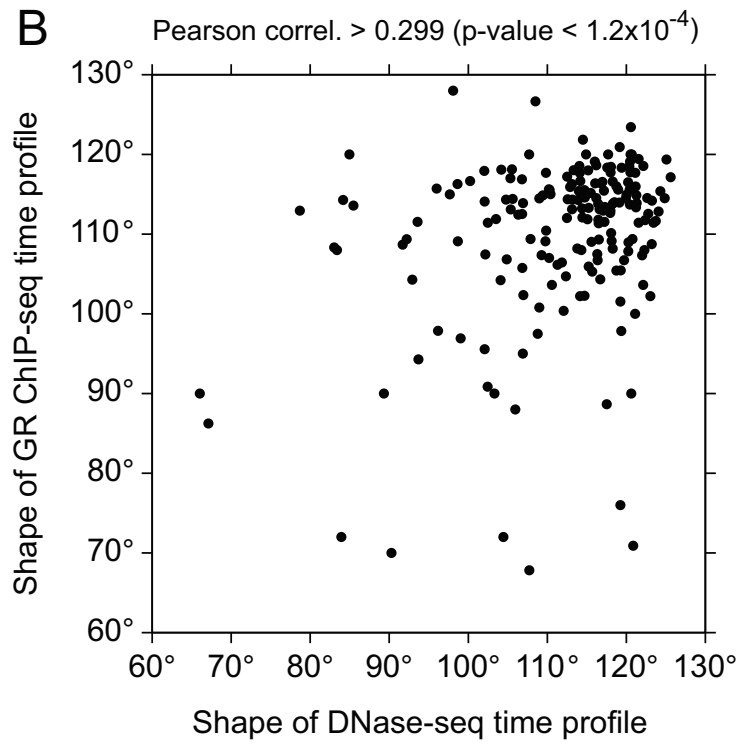

Supplement: supp_gr.184168.114_FigureS5_1.pdf [file supp_gr.184168.114_FigureS5_1.pdf]

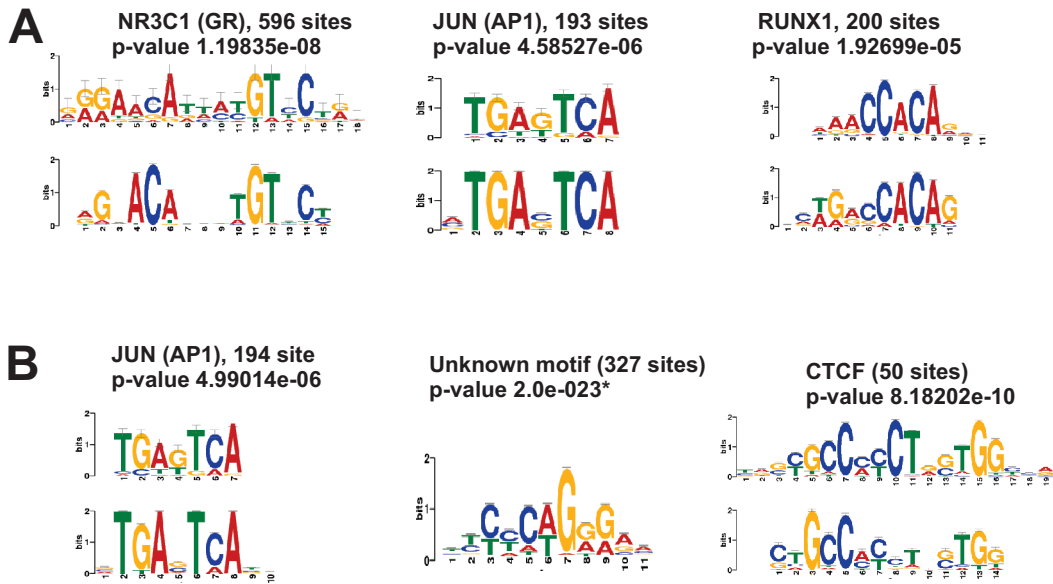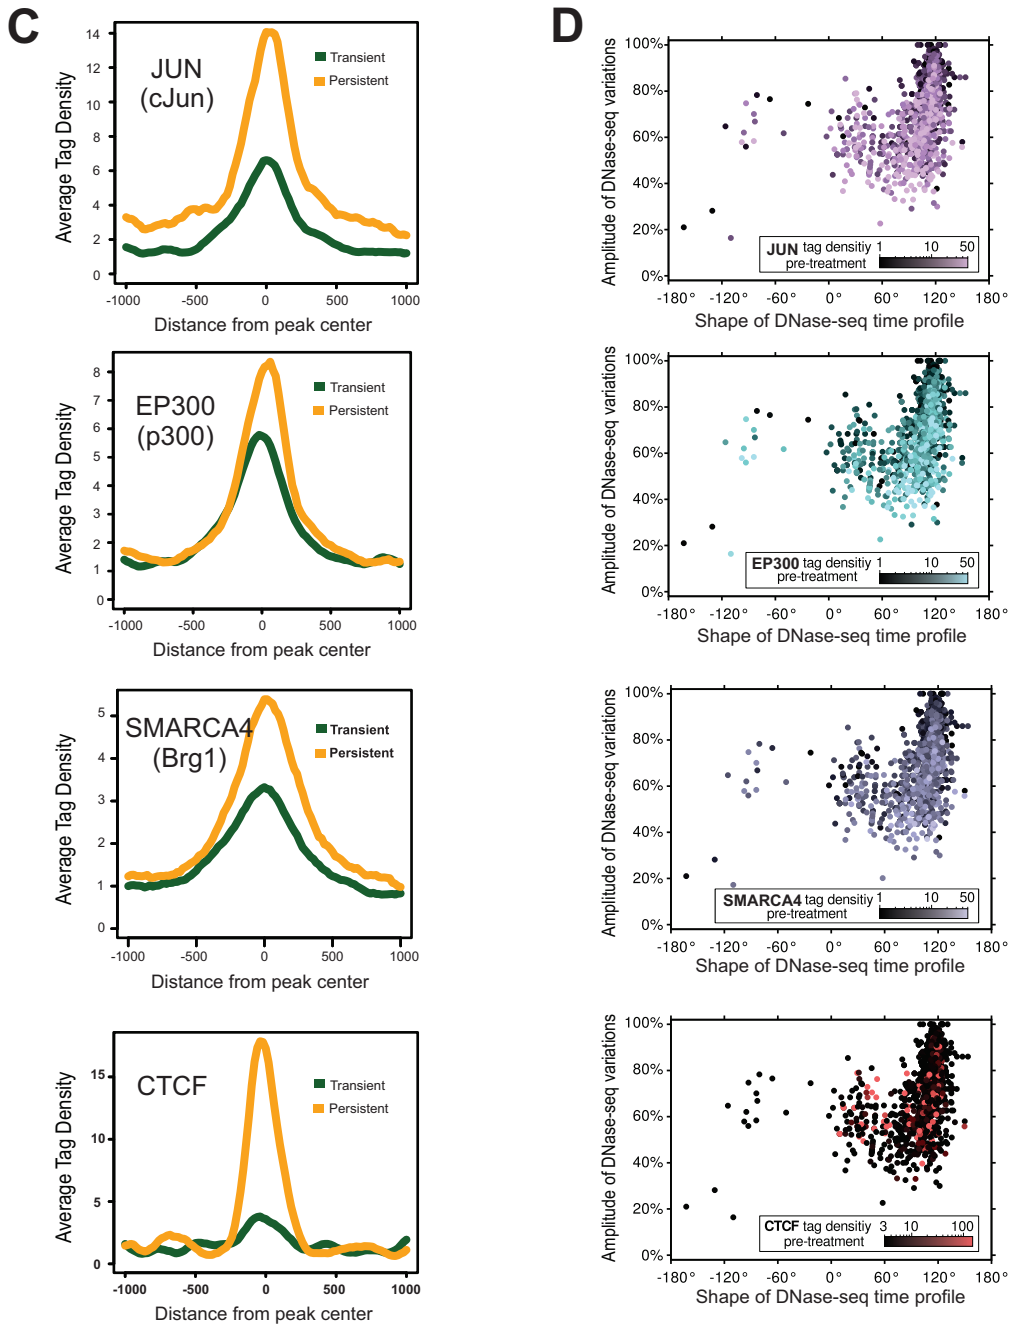

Supplement: supp_gr.184168.114_FigureS6_1.pdf [file supp_gr.184168.114_FigureS6_1.pdf]

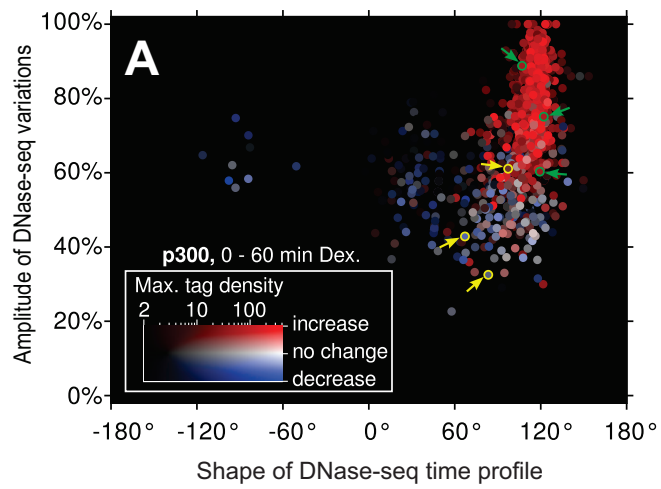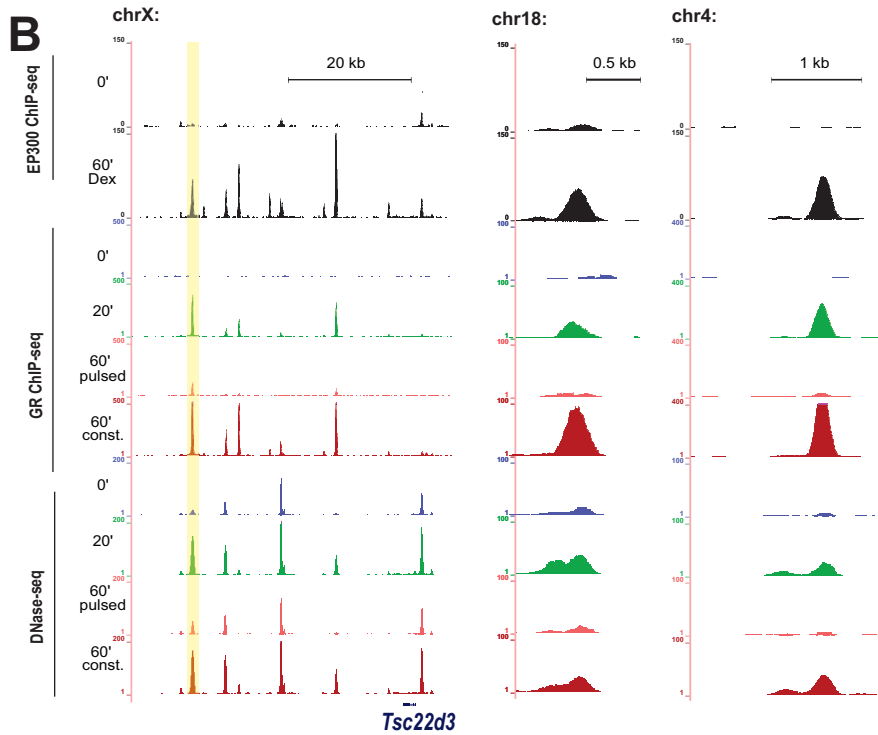

**C**

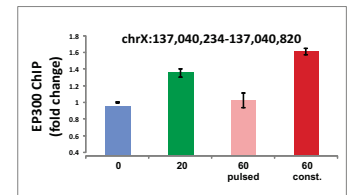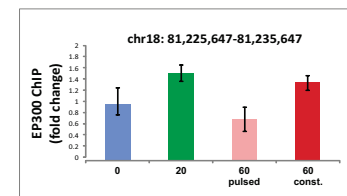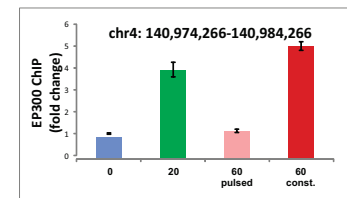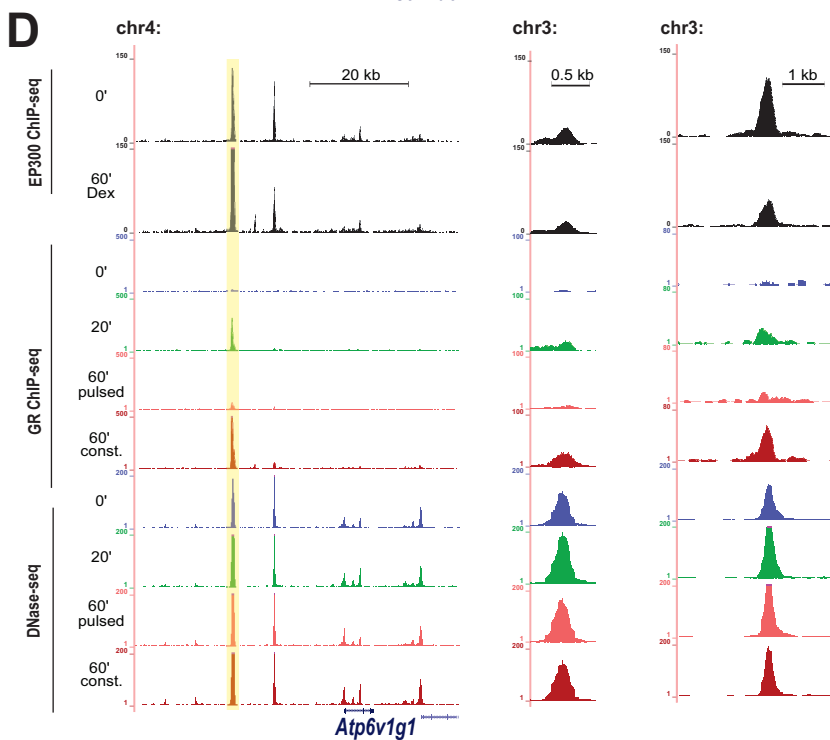

**E**

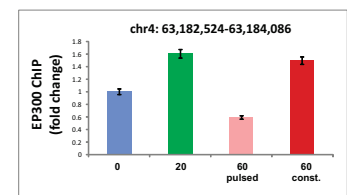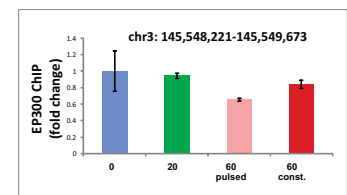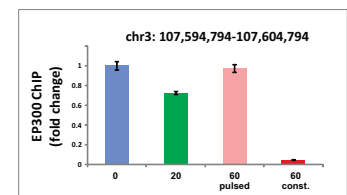

Supplement: supp_gr.184168.114_FigureS7_1.pdf [file supp_gr.184168.114_FigureS7_1.pdf]

**A**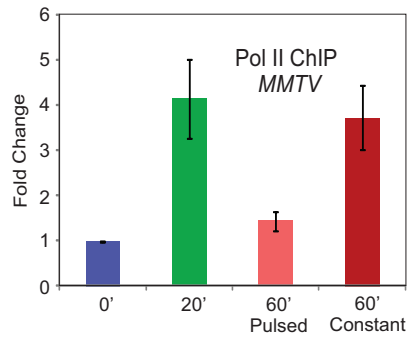**B**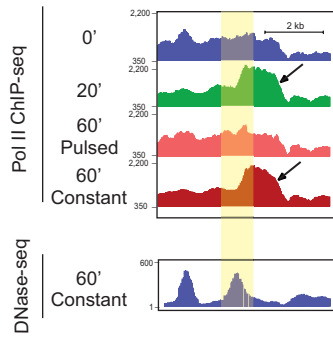**I**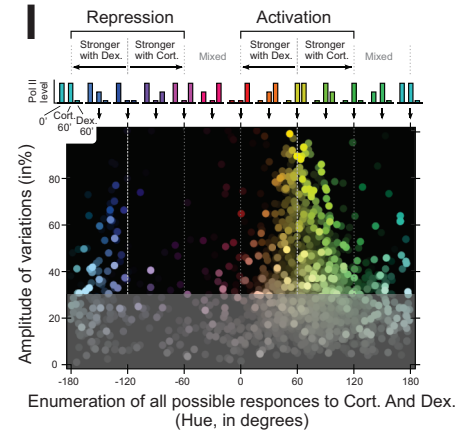**C**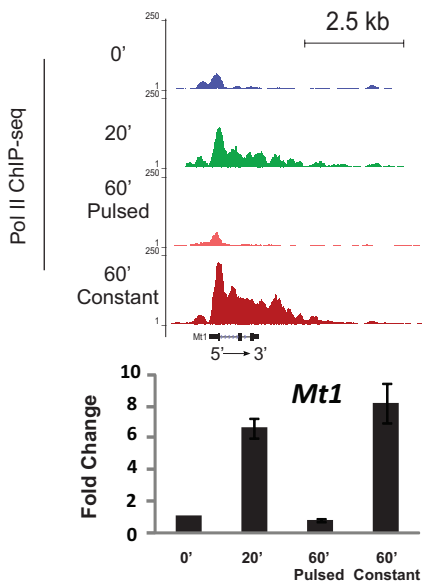**D**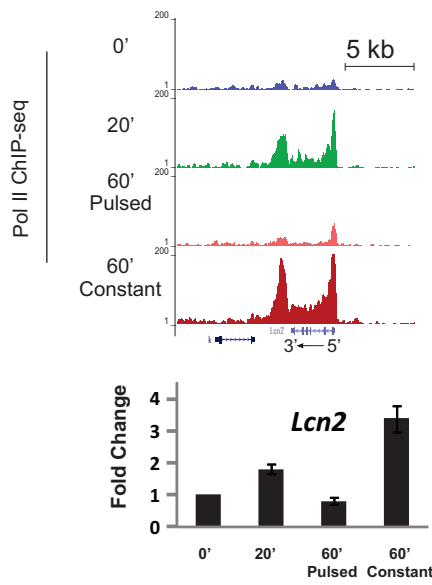**E**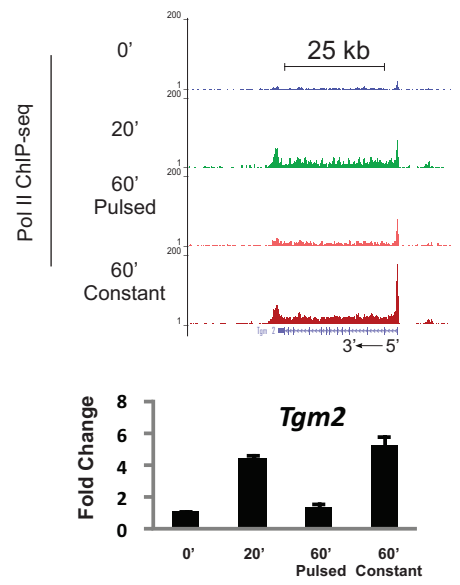**F**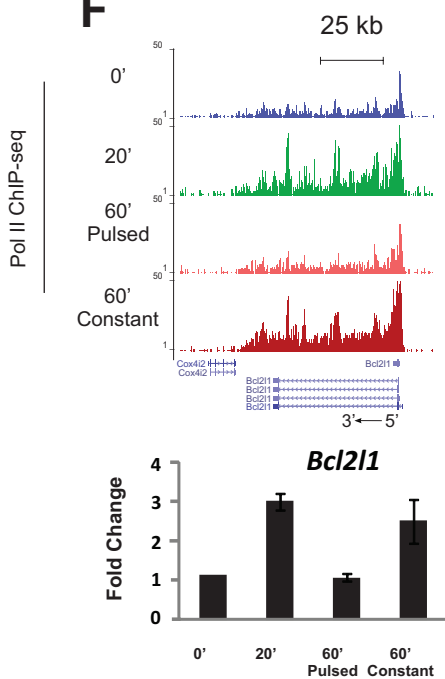**G**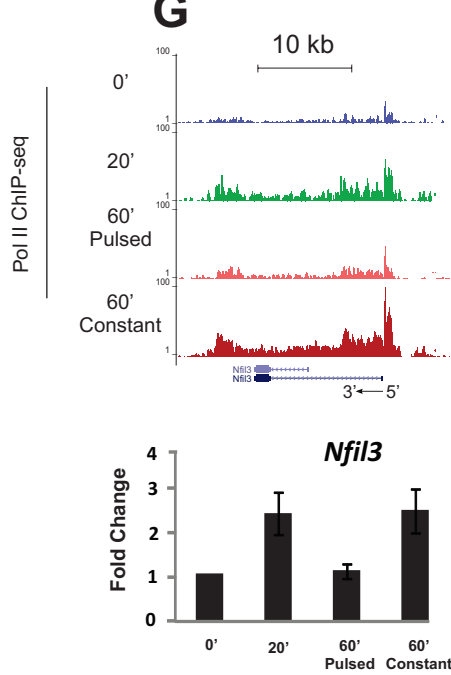**H**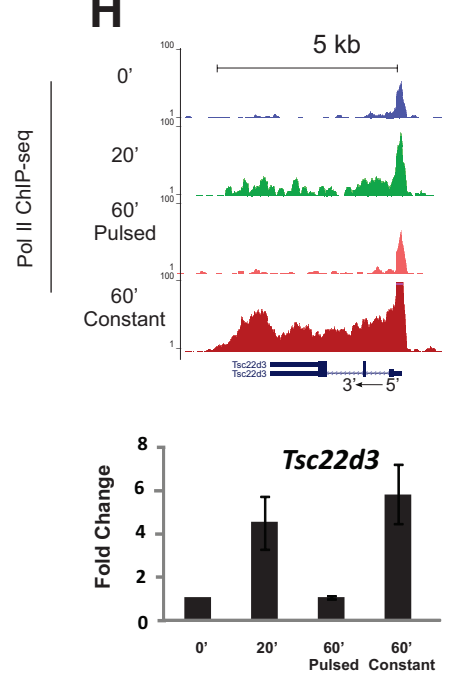

Supplement: supp_gr.184168.114_FigureS8_1.pdf [file supp_gr.184168.114_FigureS8_1.pdf]

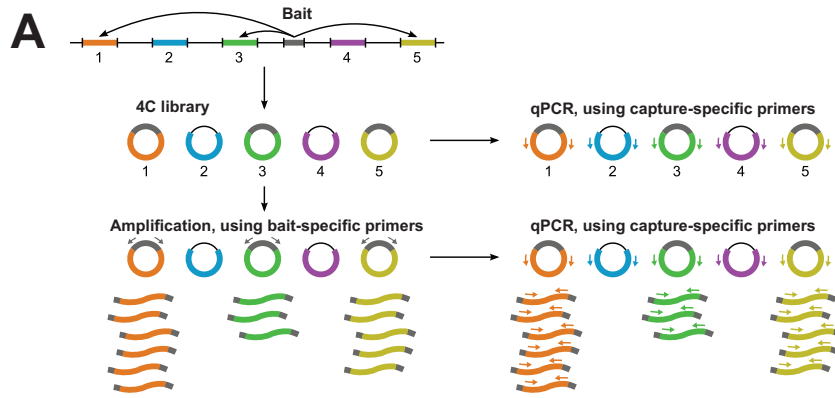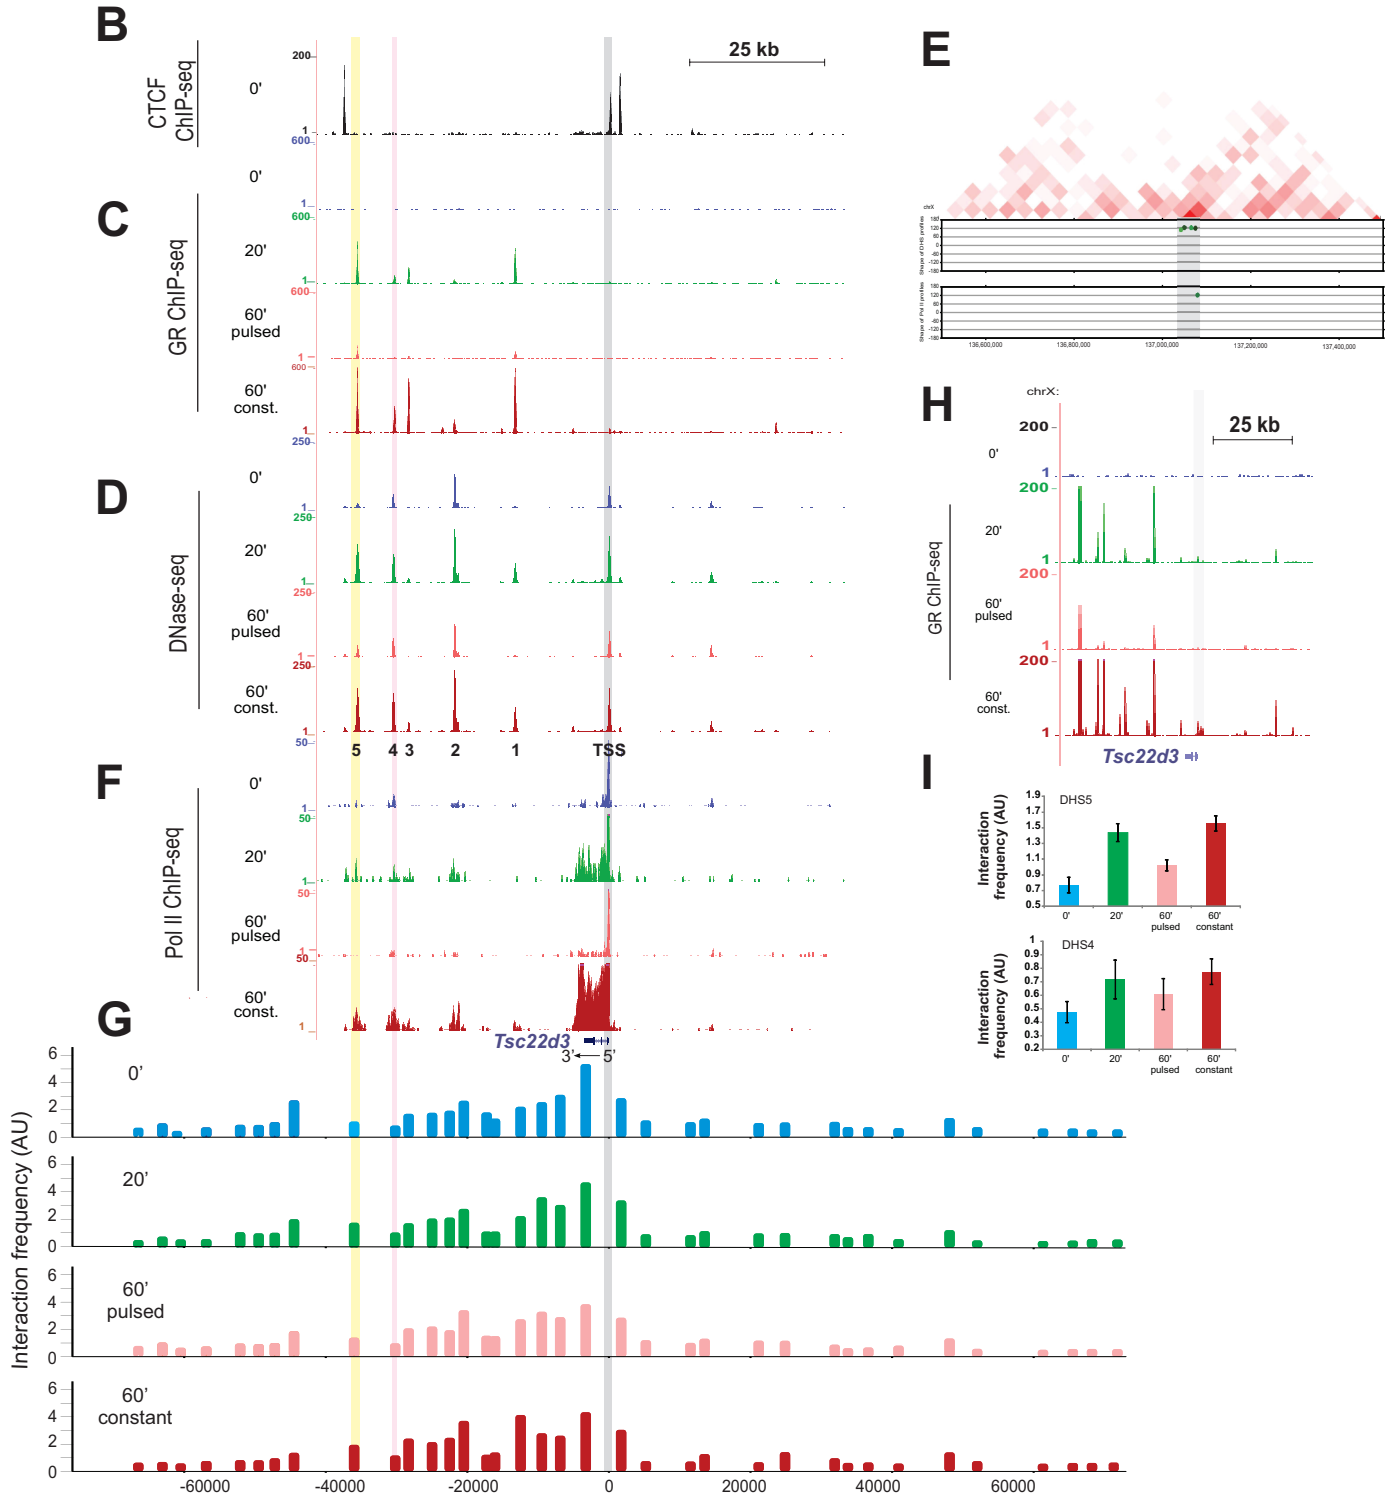

Supplement: supp_gr.184168.114_FigureS9_1.pdf [file supp_gr.184168.114_FigureS9_1.pdf]
